# Supplementary material for: Insights into the alteration of vaginal microbiota and metabolites in pregnant woman with preterm delivery
Source: Research Square preprint supplement (doi:10.21203/rs.3.rs-6171036/v1), 2025-05-07

**Supplementary data**

**Figure S1** Venn diagram illustrates the overlap of the operational taxonomic units (OTUs) between the PrPG and PrTG groups.


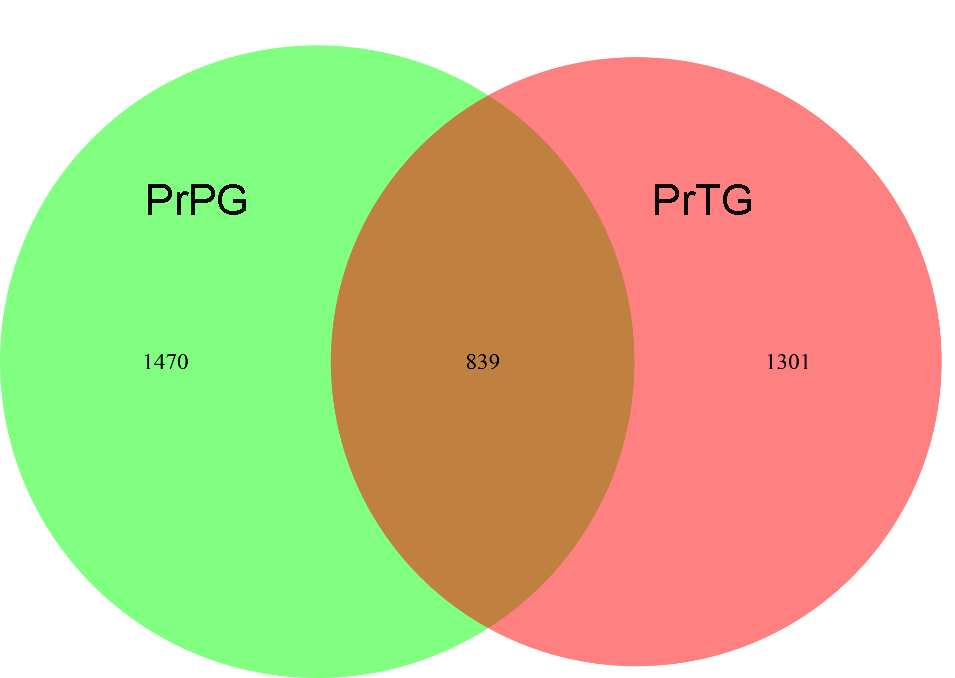

Supplement: Supplementary file 1 [file d9dde6d2329a54f06da3a5c1.docx]
